# Supplementary material
Source: Springer Nature journal article supplement (https://www.springermedizin.de/resource/supplementary/12874_2012_914_MOESM2_ESM.pdf/9433050)

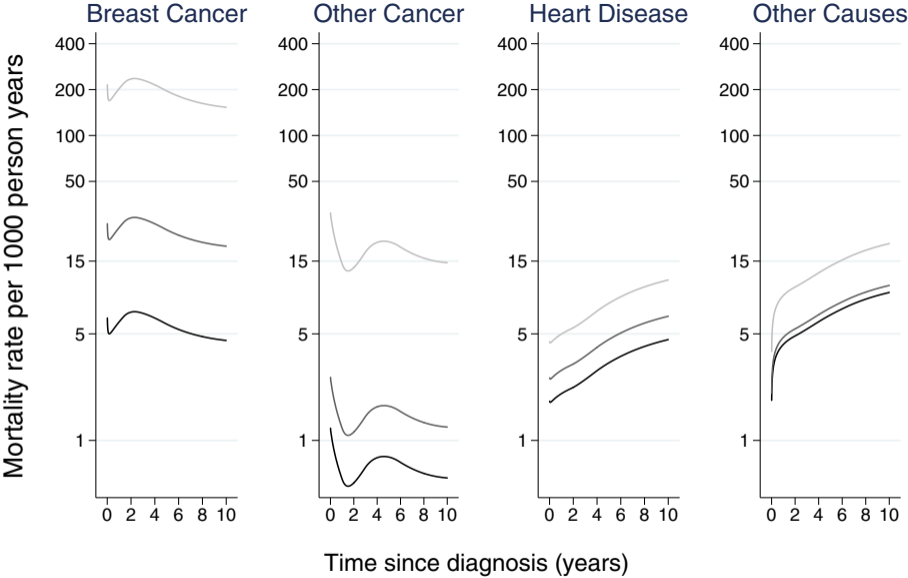

Localised
  Regional
  Distant

Supplement: MOESM2 [file 9433050]
